# Supplementary material for: Chronic spinal cord injury functionally repaired by direct implantation of encapsulated hair-follicle-associated pluripotent (HAP) stem cells in a mouse model: Potential for clinical regenerative medicine
Source: PubMed Central journal article supplement (PMC8794105; doi:10.1371/journal.pone.0262755), 2022-01-27

Figure4A

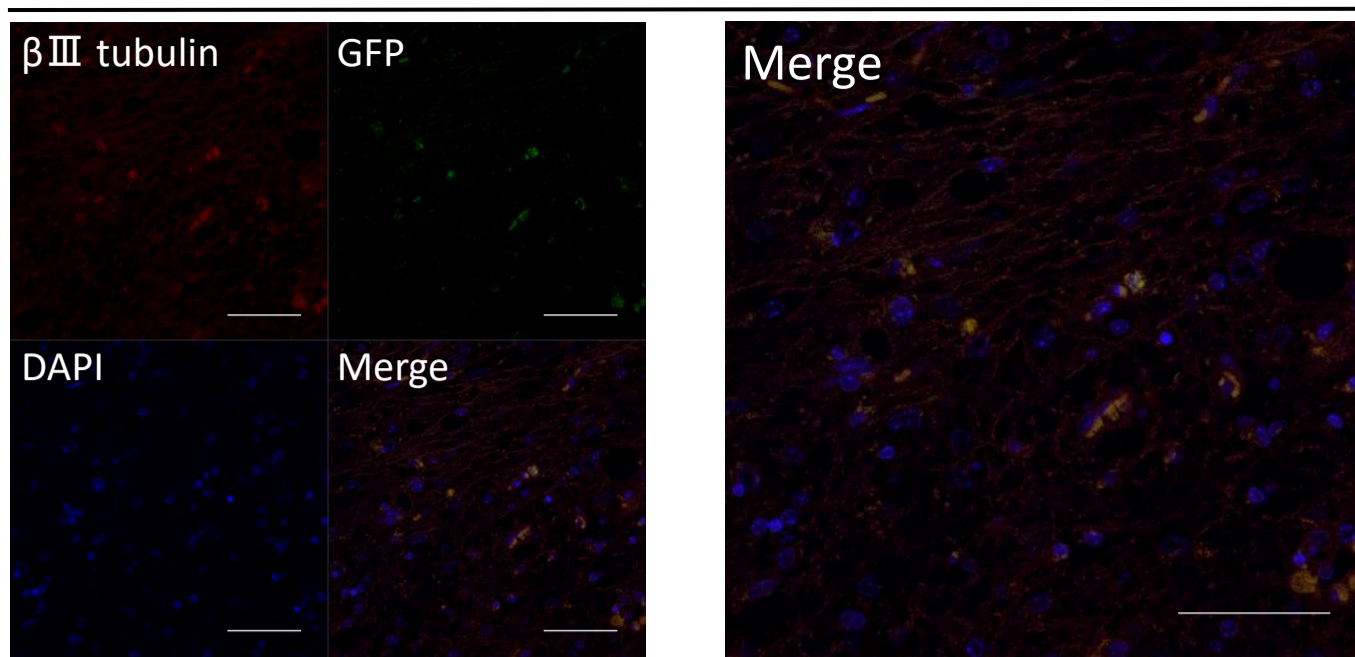

Figure4B

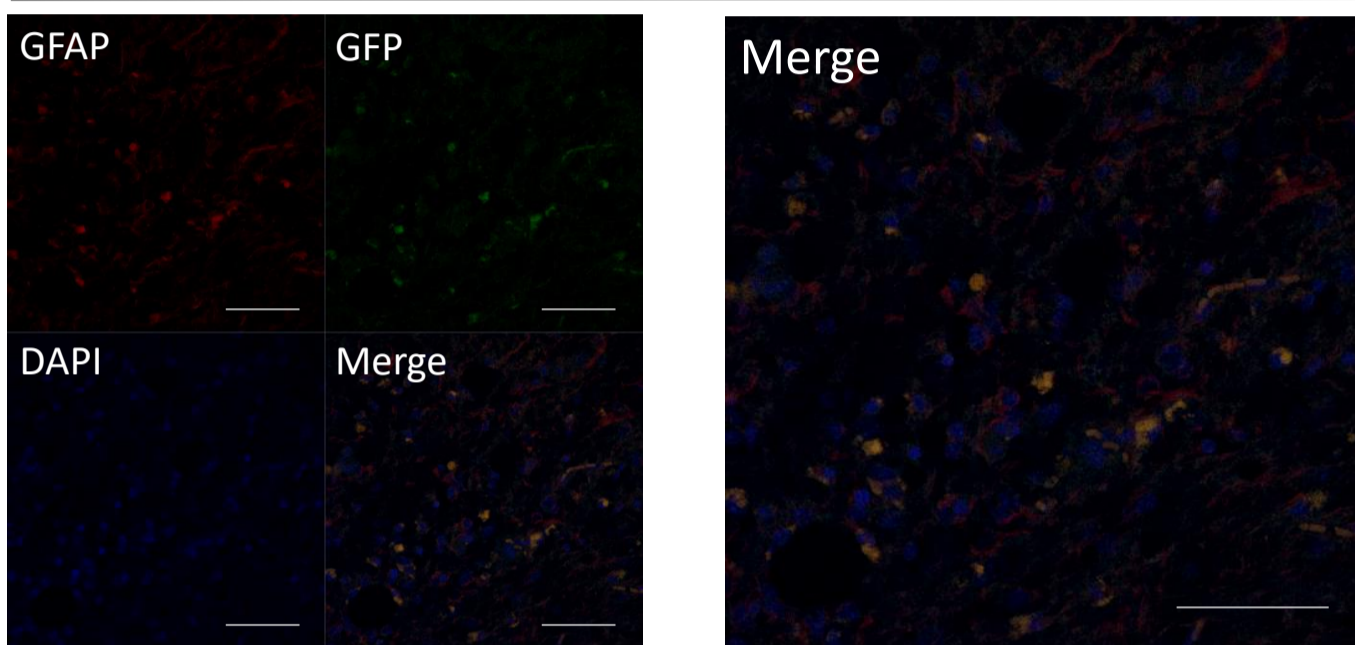

Figure4C

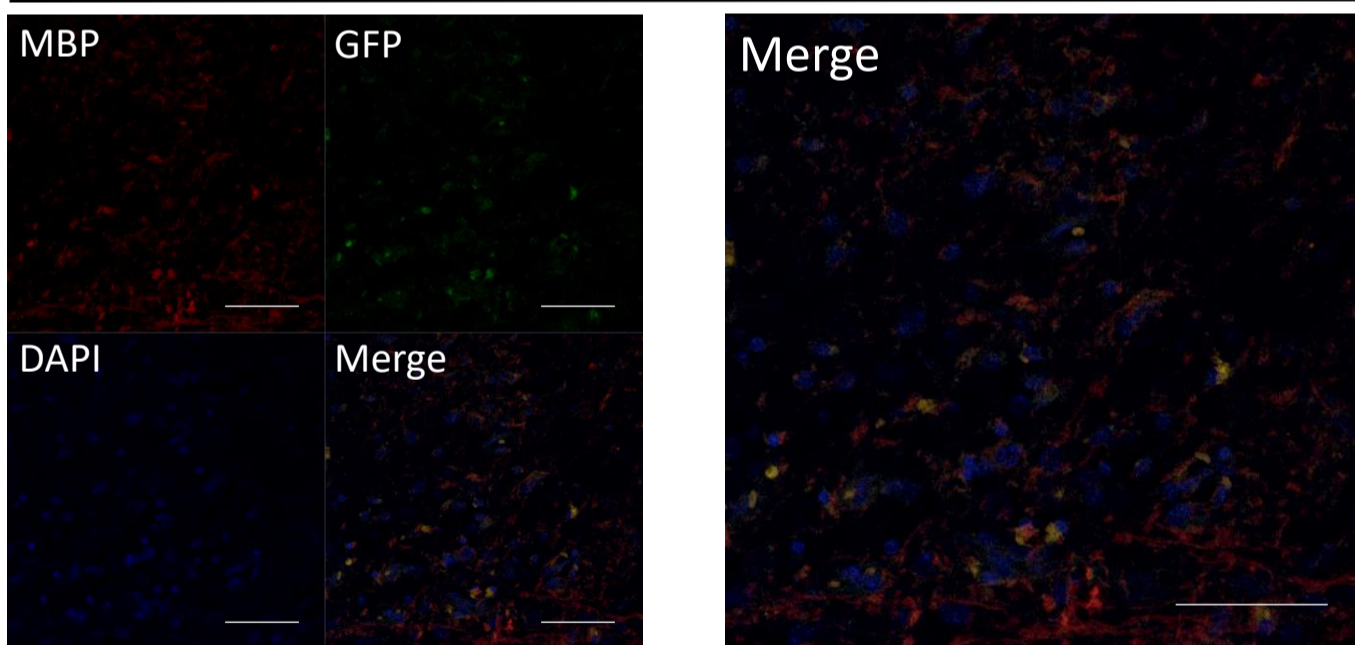

Figure4D

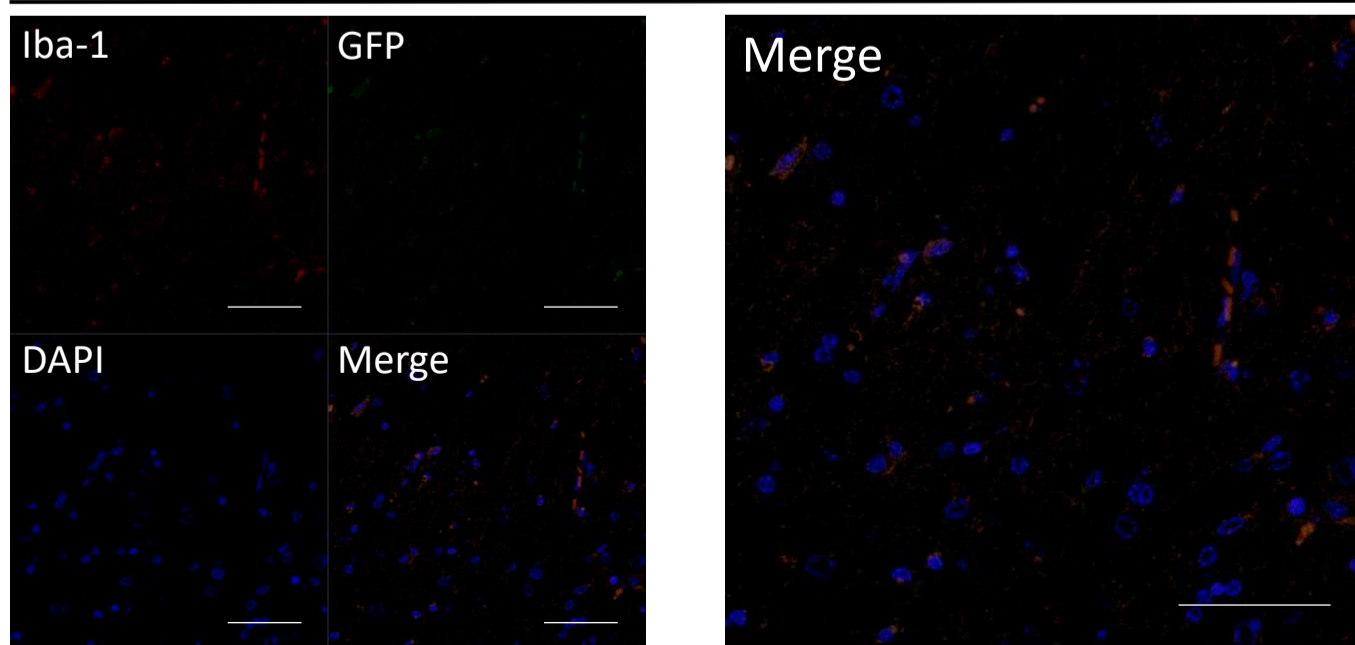

Supplement: pone.0262755.s001.pdf [file pone.0262755.s001.pdf]
